# Supplementary material for: Enterotoxigenic Potential of Coagulase-Negative Staphylococci from Ready-to-Eat Food
Source: PubMed Central journal article supplement (PMC7559265; doi:10.3390/pathogens9090734), 2020-09-06
Supplement: pathogens-09-00734-s001.pdf [file pathogens-09-00734-s001.pdf]

## Supplementary materials:

Table S1. List of primer sequences used in PCR reactions.

|               | Genes       | Primers                                   | Sequence (5' → 3')                      | Product size (bp) | References |
|---------------|-------------|-------------------------------------------|-----------------------------------------|-------------------|------------|
| Multiplex I   | <i>sea</i>  | sea-1                                     | GAA AAA AGT CTG AAT TGC AGG GAA CA      | 560               | [1]        |
|               |             | sea-2                                     | CAA ATA AAT CGT AAT TAA CCG AAG GTT C   |                   |            |
|               | <i>seh</i>  | seh-1                                     | CAA TCA CAT CAT ATG CGA AAG CAG         | 376               | [1]        |
|               |             | she-2                                     | CAT CTA CCC AAA CAT TAG CAC C           |                   |            |
|               | <i>sec</i>  | sec-1                                     | CTT GTA TGT ATG GAG GAA TAA CAA AAC ATG | 275               | [1]        |
|               |             | sec-2                                     | CAT ATC ATA CCA AAA AGT ATT GCC GT      |                   |            |
| <i>tst-1</i>  | tst-1       | TTC ACT ATT TGT AAA AGT GTC AGA CCC ACT   | 180                                     | [1]               |            |
|               | tst-2       | TAC TAA TGA ATT TTT TTA TCG TAA GCC CTT   |                                         |                   |            |
| Multiplex II  | <i>sed</i>  | sed-1                                     | GAA TTA AGT AGT ACC GCG CTA AAT AAT ATG | 492               | [1]        |
|               |             | sed-2                                     | GCT GTA TTT TTC CTC CGA GAG T           |                   |            |
|               | <i>etd</i>  | etd-1                                     | CAA ACT ATC ATG TAT CAA GGA TGG         | 358               | [2]        |
|               |             | etd-2                                     | CCA GAA TTT CCC GAC TCA G               |                   |            |
|               | <i>eta</i>  | eta-1                                     | ACT GTA GGA GCT AGT GCA TTT GT          | 190               | [1]        |
|               |             | eta-2                                     | TGG ATA CTT TTG TCT ATC TTT TTC ATC AAC |                   |            |
| <i>selk</i>   | sek-1       | ATG CCA GCG CTC AAG GC                    | 134                                     | [3]               |            |
|               | sek-2       | AGA TTC ATT TGA AAA TTG TAG TTG ATT AGC T |                                         |                   |            |
|               |             | sek-3                                     | TGC CAG CGC TCA AGG TG                  |                   |            |
| Multiplex III | <i>see</i>  | see-1                                     | CAA AGA AAT GCT TTA AGC AAT CTT AGG C   | 482               | [1]        |
|               |             | see-2                                     | CAC CTT ACC GCC AAA GCT G               |                   |            |
|               | <i>seb</i>  | seb-1                                     | ATT CTA TTA AGG ACA CTA AGT TAG GGA     | 404               | [1]        |
|               |             | seb-2                                     | ATC CCG TTT CAT AAG GCG AGT             |                   |            |
|               | <i>selm</i> | sem-1                                     | CTA TTA ATC TTT GGG TTA ATG GAG AAC     | 326               | [1]        |
|               |             | sem-2                                     | TTC AGT TTC GAC AGT TTT GTT GTC AT      |                   |            |
| <i>sell</i>   | sel-1       | GCG ATG TAG GTC CAG GAA AC                | 234                                     | [3]               |            |
|               | sel-2       | CAT ATA TAG TAC GAG AGT TAG AAC CAT A     |                                         |                   |            |
| <i>selo</i>   | seo-1       | AGT TTG TGT AAG AAG TCA AGT GTA GA        | 180                                     | [1]               |            |
|               | seo-2       | ATC TTT AAA TTC AGC AGA TAT TCC ATC TAA C |                                         |                   |            |
| Multiplex IV  | <i>seln</i> | sen-1                                     | CGT GGC AAT TAG ACG AGT C               | 474               | [3]        |
|               |             | sen-2                                     | GAT TGA TYT TGA TGA TTA TKA G           |                   |            |
|               | <i>seg</i>  | seg-1                                     | TCT CCA CCT GTT GAA GG                  | 323               | [3]        |
|               |             | seg-2                                     | AAG TGA TTG TCT ATT GTC G               |                   |            |
|               | <i>selq</i> | seq-1                                     | ACC TGA AAA GCT TCA AGG A               | 204               | [3]        |
|               |             | seq-2                                     | CGC CAA CGT AAT TCC AC                  |                   |            |
| <i>selj</i>   | sej-1       | TCA GAA CTG TTG TTC CGC TAG               | 138                                     | [3]               |            |
|               | sej-2       | GAA TTT TAC CAY CAA AGG TAC               |                                         |                   |            |
| Multiplex V   | <i>sei</i>  | sei-1                                     | CTY GAA TTT TCA ACM GGT AC              | 461               | [3]        |
|               |             | sei-2                                     | AGG CAG TCC ATC TCC TG                  |                   |            |
|               | <i>ser</i>  | ser-1                                     | AGC GGT AAT AGC AGA AAA TG              | 363               | [3]        |
|               |             | ser-2                                     | TCT TGT ACC GTA ACC GTT TT              |                   |            |
|               | <i>selu</i> | seu-1                                     | AAT GGC TCT AAA ATT GAT GG              | 215               | [3]        |
|               |             | seu-2                                     | ATT TGA TTT CCA TCA TGC TC              |                   |            |
| <i>selp</i>   | sep-1       | GAA TTG CAG GGA ACT GCT                   | 182                                     | [3]               |            |
|               | sep-2       | GGC GGT GTC TTT TGA AC                    |                                         |                   |            |

## References

- Jarraud, S.; Mougel, C.; Thioulouse, J.; Lina, G.; Meugnier, H.; Forey, F.; Nesme, X.; Etienne, J.; Vandenesch, F. Relationships between *Staphylococcus aureus* genetic background, virulence factors, *agr* groups (alleles), and human disease. *Infect. Immun.* **2002**, *70*, 631-641.
- Zhang, S.; Iandolo, J.J.; Stewart, G.C. The enterotoxin D plasmid of *Staphylococcus aureus* encodes a second enterotoxin determination (*sej*). *FEMS Microbiol. Lett.* **1998**, *168*, 227-233.
- Holtfreter, S.; Grumann, D.; Schudde, M.; Nguyen, H.T.T.; Eichler, P.; Strommenger, B.; Kopron, K.; Kolata, J.; Giedrys-Kalemba, S.; Steinmetz, I.; Witte, W.; Bröker, B. M. Clonal distribution of superantigen genes in clinical *Staphylococcus aureus* isolates. *J. Clin. Microbiol.* **2007**, *45*, 2669-2680.
